# Supplementary material for: Biochemical and immunological indicators suggesting natural resistance to Leishmania infantum in dogs from an endemic Mediterranean area
Source: Research Square preprint supplement (doi:10.21203/rs.3.rs-8027991/v1), 2025-11-18
Supplement: Supplementary file 1 [file 7ad8c722d84e42836667a0bd.xlsx]

## Sheet: By Sex
Variable	Sex	N	Mean	SD	p_value_FDR
A/G ratio	F	20	1.05	0.28	0.7709
A/G ratio	M	12	1.11	0.26	0.7709
ALT	F	20	44.75	20.1	0.9373
ALT	M	12	50.75	27.55	0.9373
AST	F	20	39.35	9.65	0.9008
AST	M	12	36.75	8.93	0.9008
Albumin	F	20	3.14	0.31	0.7709
Albumin	M	12	3.25	0.34	0.7709
Basofi	F	20	0.01	0.01	0.9373
Basofi	M	12	0.01	0.01	0.9373
Basofilo %	F	20	0.12	0.1	0.9373
Basofilo %	M	12	0.1	0.07	0.9373
Beta-1 globulin	F	20	0.84	0.18	0.5976
Beta-1 globulin	M	12	0.7	0.12	0.5976
Beta-2 globulin	F	20	0.65	0.13	0.5976
Beta-2 globulin	M	12	0.59	0.16	0.5976
Bilirrubin	F	20	0.34	0.15	0.9767
Bilirrubin	M	12	0.32	0.09	0.9767
Calcium	F	20	9.95	1.31	0.98
Calcium	M	12	10.04	1.4	0.98
Cholesterol	F	20	194.2	42.32	0.5976
Cholesterol	M	12	209.58	21.49	0.5976
Creatinine	F	20	1.39	0.3	0.7709
Creatinine	M	12	1.43	0.15	0.7709
Divario Osmolare	F	20	12.65	2.83	0.8798
Divario Osmolare	M	12	14.08	3.96	0.8798
Eosinof	F	20	2.24	1.29	0.8798
Eosinof	M	12	1.81	1.22	0.8798
Eosinofilo %	F	20	16.35	7.49	0.6455
Eosinofilo %	M	12	12.94	5.96	0.6455
Fosfatasa	F	20	79.3	45.71	0.9845
Fosfatasa	M	12	76.08	43.11	0.9845
GGT	F	20	8.85	3.62	0.5976
GGT	M	12	7.17	3.83	0.5976
Gamma globulin	F	20	0.78	0.21	0.9845
Gamma globulin	M	12	0.91	0.64	0.9845
Glucose	F	20	66.75	6.54	0.9767
Glucose	M	12	69.08	9.54	0.9767
Hematocrit	F	20	43.67	6.08	0.9373
Hematocrit	M	12	43.5	6.11	0.9373
Hematocrit 1	F	20	43.59	6.01	0.9373
Hematocrit 1	M	12	43.49	6.11	0.9373
Hemoglob	F	20	15.56	1.72	0.9373
Hemoglob	M	12	15.66	1.71	0.9373
Hemoglobin	F	20	15.59	1.71	0.9373
Hemoglobin	M	12	15.66	1.71	0.9373
Hfr	F	20	10.76	4.1	0.5976
Hfr	M	12	14.17	5.22	0.5976
Irf	F	20	19.03	6.77	0.8114
Irf	M	12	22.65	8.5	0.8114
Lfr	F	20	81.04	6.83	0.8114
Lfr	M	12	77.45	8.56	0.8114
Linfocit	F	20	3.72	1.2	0.9373
Linfocit	M	12	3.91	1.17	0.9373
Linfocit %	F	20	27.65	4.18	0.5976
Linfocit %	M	12	30.61	4.78	0.5976
MCH	F	20	24.34	0.66	0.8114
MCH	M	12	24.59	0.85	0.8114
MCHC	F	20	36	2.7	0.9373
MCHC	M	12	36.23	2.49	0.9373
MCV	F	20	68.09	5.11	0.9373
MCV	M	12	68.37	5.77	0.9373
MPV	F	20	10.43	0.77	0.8798
MPV	M	12	10.64	0.57	0.8798
Mch 1	F	20	24.45	0.82	0.8652
Mch 1	M	12	24.6	0.85	0.8652
Mchc 1	F	20	35.94	2.71	0.9373
Mchc 1	M	12	36.22	2.49	0.9373
Mcv 1	F	20	68.45	5.33	0.9777
Mcv 1	M	12	68.33	5.77	0.9777
Mfr	F	20	8.57	3.13	0.9373
Mfr	M	12	8.6	3.91	0.9373
Monocit	F	20	0.32	0.12	0.5976
Monocit	M	12	0.21	0.06	0.5976
Monocito %	F	20	2.69	1.45	0.5976
Monocito %	M	12	1.81	0.73	0.5976
Mpv 1	F	20	10.48	0.8	0.9373
Mpv 1	M	12	10.65	0.57	0.9373
Neutroph	F	20	7.11	2.2	0.9845
Neutroph	M	12	7.05	2.37	0.9845
Neutroph %	F	20	51.7	8	0.9373
Neutroph %	M	12	52.87	8.41	0.9373
Nrbc	F	20	0.01	0.01	0.8798
Nrbc	M	12	0.02	0.03	0.8798
Nrbc %	F	20	0.08	0.06	0.8334
Nrbc %	M	12	0.19	0.32	0.8334
Osm Ser Calc	F	20	296.7	4.69	0.8644
Osm Ser Calc	M	12	298.92	5.7	0.8644
Osm Ser Med	F	20	309.35	5.08	0.5976
Osm Ser Med	M	12	313	4.75	0.5976
P Lcr	F	20	30.6	5.73	0.8798
P Lcr	M	12	32.23	5.38	0.8798
P Lcr 1	F	20	31.06	6.07	0.9373
P Lcr 1	M	12	32.29	5.37	0.9373
PCT	F	20	0.23	0.08	0.5976
PCT	M	12	0.2	0.07	0.5976
PDW	F	20	13.38	1.24	0.8652
PDW	M	12	13.51	1.25	0.8652
Pct 1	F	20	0.23	0.09	0.5976
Pct 1	M	12	0.19	0.07	0.5976
Pdw 1	F	20	13.61	1.53	0.9373
Pdw 1	M	12	13.54	1.25	0.9373
Phosphorus	F	20	5.07	1	0.98
Phosphorus	M	12	4.97	0.87	0.98
Platelets	F	20	236.62	84.33	0.7211
Platelets	M	12	194.56	73.72	0.7211
Potasio	F	20	4.53	0.35	0.9373
Potasio	M	12	4.47	0.3	0.9373
RBC	F	20	6.4	0.67	0.9373
RBC	M	12	6.36	0.61	0.9373
Rbc	F	20	6.36	0.69	0.939
Rbc	M	12	6.36	0.61	0.939
Rdw	F	20	12.72	1.4	0.9373
Rdw	M	12	12.41	1.01	0.9373
Rdw Cv	F	20	12.77	1.41	0.9373
Rdw Cv	M	12	12.42	1.02	0.9373
Ret He	F	20	24.52	0.97	0.9373
Ret He	M	12	24.77	1.03	0.9373
Reticolociti	F	20	43.35	18.14	0.9373
Reticolociti	M	12	39.29	20.27	0.9373
Reticolociti %	F	20	0.67	0.25	0.8798
Reticolociti %	M	12	0.61	0.28	0.8798
Sodium	F	20	144.05	2.48	0.9373
Sodium	M	12	144.58	2.64	0.9373
Total Prot	F	20	6.24	0.27	0.9373
Total Prot	M	12	6.32	0.47	0.9373
Urea	F	20	13.15	3.66	0.5976
Urea	M	12	16.58	5.18	0.5976
WBC	F	20	13.82	3.23	0.9373
WBC	M	12	13.05	4.07	0.9373
Wbc	F	20	13.54	3.63	0.9845
Wbc	M	12	13.15	4.08	0.9845
Α1 Globulin	F	20	0.25	0.06	0.9373
Α1 Globulin	M	12	0.24	0.06	0.9373
Α2 Globulin	F	20	0.58	0.12	0.8114
Α2 Globulin	M	12	0.63	0.1	0.8114

## Sheet: By Age group
Variable	Age group	N	Mean	SD	p_value_FDR
A/G ratio	Adult	12	0.98	0.21	0.5796
A/G ratio	Puppy	3	1.16	0.12	0.5796
A/G ratio	Senior	3	0.77	0.15	0.5796
A/G ratio	Young	14	1.2	0.29	0.5796
ALT	Adult	12	46.5	26.48	0.8305
ALT	Puppy	3	46.67	17.47	0.8305
ALT	Senior	3	36	2.65	0.8305
ALT	Young	14	49.86	23.98	0.8305
AST	Adult	12	40.58	11.63	0.8927
AST	Puppy	3	35.67	9.24	0.8927
AST	Senior	3	35.33	7.64	0.8927
AST	Young	14	37.71	7.89	0.8927
Albumin	Adult	12	3.1	0.32	0.7783
Albumin	Puppy	3	3.37	0.15	0.7783
Albumin	Senior	3	2.87	0.4	0.7783
Albumin	Young	14	3.28	0.29	0.7783
Basofi	Adult	12	0.02	0.01	0.7783
Basofi	Puppy	3	0.02	0.03	0.7783
Basofi	Senior	3	0.01	0.01	0.7783
Basofi	Young	14	0.01	0.01	0.7783
Basofilo %	Adult	12	0.14	0.08	0.7887
Basofilo %	Puppy	3	0.1	0.17	0.7887
Basofilo %	Senior	3	0.07	0.06	0.7887
Basofilo %	Young	14	0.11	0.09	0.7887
Beta-1 globulin	Adult	12	0.79	0.15	0.7783
Beta-1 globulin	Puppy	3	0.83	0.14	0.7783
Beta-1 globulin	Senior	3	0.96	0.23	0.7783
Beta-1 globulin	Young	14	0.74	0.18	0.7783
Beta-2 globulin	Adult	12	0.68	0.14	0.5796
Beta-2 globulin	Puppy	3	0.57	0.06	0.5796
Beta-2 globulin	Senior	3	0.75	0.1	0.5796
Beta-2 globulin	Young	14	0.57	0.14	0.5796
Bilirrubin	Adult	12	0.38	0.15	0.7783
Bilirrubin	Puppy	3	0.24	0.03	0.7783
Bilirrubin	Senior	3	0.3	0.06	0.7783
Bilirrubin	Young	14	0.32	0.12	0.7783
Calcium	Adult	12	9.77	1.45	0.8927
Calcium	Puppy	3	10.1	1.39	0.8927
Calcium	Senior	3	10.57	0.67	0.8927
Calcium	Young	14	10.01	1.38	0.8927
Cholesterol	Adult	12	200.83	47.83	0.8467
Cholesterol	Puppy	3	195.67	24.01	0.8467
Cholesterol	Senior	3	189	28.79	0.8467
Cholesterol	Young	14	202.5	30.86	0.8467
Creatinine	Adult	12	1.34	0.22	0.5796
Creatinine	Puppy	3	1.27	0.06	0.5796
Creatinine	Senior	3	1.9	0.36	0.5796
Creatinine	Young	14	1.38	0.17	0.5796
Divario Osmolare	Adult	12	13.83	3.35	0.8275
Divario Osmolare	Puppy	3	14.33	1.15	0.8275
Divario Osmolare	Senior	3	11.33	4.04	0.8275
Divario Osmolare	Young	14	12.79	3.51	0.8275
Eosinof	Adult	12	2.25	1.49	0.7783
Eosinof	Puppy	3	3.04	0.65	0.7783
Eosinof	Senior	3	1.83	0.78	0.7783
Eosinof	Young	14	1.78	1.19	0.7783
Eosinofilo %	Adult	12	16.8	9.07	0.7783
Eosinofilo %	Puppy	3	17.73	5.33	0.7783
Eosinofilo %	Senior	3	15.42	2.42	0.7783
Eosinofilo %	Young	14	12.94	5.88	0.7783
Fosfatasa	Adult	12	80.5	54.99	0.7783
Fosfatasa	Puppy	3	116	74.65	0.7783
Fosfatasa	Senior	3	88	26.85	0.7783
Fosfatasa	Young	14	65.79	24.13	0.7783
GGT	Adult	12	10.08	4.91	0.7783
GGT	Puppy	3	6.33	3.51	0.7783
GGT	Senior	3	9	4	0.7783
GGT	Young	14	6.86	1.51	0.7783
Gamma globulin	Adult	12	0.96	0.6	0.5796
Gamma globulin	Puppy	3	0.58	0.1	0.5796
Gamma globulin	Senior	3	1.13	0.28	0.5796
Gamma globulin	Young	14	0.7	0.19	0.5796
Glucose	Adult	12	69.08	5.45	0.7783
Glucose	Puppy	3	72	10.54	0.7783
Glucose	Senior	3	65.33	10.07	0.7783
Glucose	Young	14	65.93	8.62	0.7783
Hematocrit	Adult	12	44.76	3.98	0.7783
Hematocrit	Puppy	3	39.03	6.12	0.7783
Hematocrit	Senior	3	41.4	2.07	0.7783
Hematocrit	Young	14	44.06	7.64	0.7783
Hematocrit 1	Adult	12	44.66	3.8	0.7783
Hematocrit 1	Puppy	3	39.03	6.12	0.7783
Hematocrit 1	Senior	3	41.39	2.05	0.7783
Hematocrit 1	Young	14	44.04	7.66	0.7783
Hemoglob	Adult	12	15.84	1.33	0.7783
Hemoglob	Puppy	3	14.13	0.9	0.7783
Hemoglob	Senior	3	15.97	0.32	0.7783
Hemoglob	Young	14	15.62	2.14	0.7783
Hemoglobin	Adult	12	15.85	1.33	0.7783
Hemoglobin	Puppy	3	14.13	0.9	0.7783
Hemoglobin	Senior	3	15.97	0.31	0.7783
Hemoglobin	Young	14	15.66	2.13	0.7783
Hfr	Adult	12	13.34	5.58	0.7783
Hfr	Puppy	3	9.67	1.53	0.7783
Hfr	Senior	3	10.68	6.11	0.7783
Hfr	Young	14	11.72	4.3	0.7783
Irf	Adult	12	22.01	8.34	0.7783
Irf	Puppy	3	15.33	2.08	0.7783
Irf	Senior	3	18.13	9.21	0.7783
Irf	Young	14	20.55	7.32	0.7783
Lfr	Adult	12	78.01	8.34	0.7783
Lfr	Puppy	3	84.67	2.08	0.7783
Lfr	Senior	3	81.9	9.2	0.7783
Lfr	Young	14	79.6	7.46	0.7783
Linfocit	Adult	12	3.39	1.06	0.7676
Linfocit	Puppy	3	4.87	0.5	0.7676
Linfocit	Senior	3	3.29	1.1	0.7676
Linfocit	Young	14	4.01	1.27	0.7676
Linfocit %	Adult	12	26.81	4.61	0.7783
Linfocit %	Puppy	3	28	2.17	0.7783
Linfocit %	Senior	3	28.72	0.9	0.7783
Linfocit %	Young	14	30.6	4.88	0.7783
MCH	Adult	12	24.54	0.64	0.7783
MCH	Puppy	3	24.83	0.23	0.7783
MCH	Senior	3	24.54	0.91	0.7783
MCH	Young	14	24.23	0.84	0.7783
MCHC	Adult	12	35.6	2.41	0.7783
MCHC	Puppy	3	36.57	3.72	0.7783
MCHC	Senior	3	38.76	2.42	0.7783
MCHC	Young	14	35.82	2.44	0.7783
MCV	Adult	12	69.3	4.1	0.7783
MCV	Puppy	3	68.33	6.81	0.7783
MCV	Senior	3	63.73	5.21	0.7783
MCV	Young	14	68.17	5.93	0.7783
MPV	Adult	12	10.68	0.6	0.7783
MPV	Puppy	3	10.4	0.78	0.7783
MPV	Senior	3	10.87	0.47	0.7783
MPV	Young	14	10.31	0.79	0.7783
Mch 1	Adult	12	24.56	0.64	0.8467
Mch 1	Puppy	3	24.83	0.23	0.8467
Mch 1	Senior	3	24.57	0.9	0.8467
Mch 1	Young	14	24.38	1.04	0.8467
Mchc 1	Adult	12	35.59	2.41	0.7783
Mchc 1	Puppy	3	36.57	3.72	0.7783
Mchc 1	Senior	3	38.75	2.45	0.7783
Mchc 1	Young	14	35.74	2.45	0.7783
Mcv 1	Adult	12	69.34	4.01	0.7783
Mcv 1	Puppy	3	68.33	6.71	0.7783
Mcv 1	Senior	3	63.7	5.21	0.7783
Mcv 1	Young	14	68.63	6.25	0.7783
Mfr	Adult	12	8.9	3.52	0.7783
Mfr	Puppy	3	6.33	1.15	0.7783
Mfr	Senior	3	7.53	3.14	0.7783
Mfr	Young	14	9.01	3.65	0.7783
Monocit	Adult	12	0.28	0.12	0.9072
Monocit	Puppy	3	0.23	0.1	0.9072
Monocit	Senior	3	0.27	0.02	0.9072
Monocit	Young	14	0.29	0.13	0.9072
Monocito %	Adult	12	2.38	1.14	0.7783
Monocito %	Puppy	3	1.3	0.46	0.7783
Monocito %	Senior	3	2.59	0.63	0.7783
Monocito %	Young	14	2.52	1.58	0.7783
Mpv 1	Adult	12	10.68	0.6	0.8275
Mpv 1	Puppy	3	10.4	0.78	0.8275
Mpv 1	Senior	3	10.88	0.46	0.8275
Mpv 1	Young	14	10.37	0.84	0.8275
Neutroph	Adult	12	6.82	1.9	0.7783
Neutroph	Puppy	3	9.32	2.17	0.7783
Neutroph	Senior	3	6	1.69	0.7783
Neutroph	Young	14	7.07	2.48	0.7783
Neutroph %	Adult	12	51.38	9.15	0.8489
Neutroph %	Puppy	3	52.87	7.59	0.8489
Neutroph %	Senior	3	49.87	5.96	0.8489
Neutroph %	Young	14	53.11	8.14	0.8489
Nrbc	Adult	12	0.02	0.04	0.8467
Nrbc	Puppy	3	0.01	0.01	0.8467
Nrbc	Senior	3	0.01	0	0.8467
Nrbc	Young	14	0.01	0.01	0.8467
Nrbc %	Adult	12	0.17	0.33	0.8275
Nrbc %	Puppy	3	0.07	0.06	0.8275
Nrbc %	Senior	3	0.11	0.01	0.8275
Nrbc %	Young	14	0.09	0.05	0.8275
Osm Ser Calc	Adult	12	296.75	5.38	0.8927
Osm Ser Calc	Puppy	3	297.33	4.16	0.8927
Osm Ser Calc	Senior	3	297	9.85	0.8927
Osm Ser Calc	Young	14	298.36	4.36	0.8927
Osm Ser Med	Adult	12	310.58	4.14	0.9082
Osm Ser Med	Puppy	3	311.67	5.03	0.9082
Osm Ser Med	Senior	3	308.33	9.61	0.9082
Osm Ser Med	Young	14	311.14	5.49	0.9082
P Lcr	Adult	12	32.71	5.22	0.7783
P Lcr	Puppy	3	29.93	8.51	0.7783
P Lcr	Senior	3	34.1	4.76	0.7783
P Lcr	Young	14	29.58	5.39	0.7783
P Lcr 1	Adult	12	32.79	5.2	0.8275
P Lcr 1	Puppy	3	29.93	8.51	0.8275
P Lcr 1	Senior	3	34.21	4.67	0.8275
P Lcr 1	Young	14	30.2	6.02	0.8275
PCT	Adult	12	0.21	0.08	0.8467
PCT	Puppy	3	0.27	0.06	0.8467
PCT	Senior	3	0.24	0.06	0.8467
PCT	Young	14	0.21	0.09	0.8467
PDW	Adult	12	13.97	1	0.7783
PDW	Puppy	3	12.1	1.4	0.7783
PDW	Senior	3	13.28	0.91	0.7783
PDW	Young	14	13.28	1.26	0.7783
Pct 1	Adult	12	0.21	0.08	0.8176
Pct 1	Puppy	3	0.27	0.06	0.8176
Pct 1	Senior	3	0.24	0.06	0.8176
Pct 1	Young	14	0.2	0.1	0.8176
Pdw 1	Adult	12	14.01	0.98	0.7783
Pdw 1	Puppy	3	12.1	1.4	0.7783
Pdw 1	Senior	3	13.33	0.93	0.7783
Pdw 1	Young	14	13.59	1.67	0.7783
Phosphorus	Adult	12	4.83	1.02	0.5796
Phosphorus	Puppy	3	6.77	0.6	0.5796
Phosphorus	Senior	3	5.03	0.51	0.5796
Phosphorus	Young	14	4.84	0.59	0.5796
Platelets	Adult	12	208.05	83.32	0.8176
Platelets	Puppy	3	280.33	86.77	0.8176
Platelets	Senior	3	242.28	60.9	0.8176
Platelets	Young	14	214.48	85.4	0.8176
Potasio	Adult	12	4.46	0.23	0.8467
Potasio	Puppy	3	4.6	0.46	0.8467
Potasio	Senior	3	4.73	0.5	0.8467
Potasio	Young	14	4.48	0.35	0.8467
RBC	Adult	12	6.45	0.48	0.7783
RBC	Puppy	3	5.69	0.36	0.7783
RBC	Senior	3	6.52	0.25	0.7783
RBC	Young	14	6.45	0.79	0.7783
Rbc	Adult	12	6.44	0.48	0.7783
Rbc	Puppy	3	5.69	0.36	0.7783
Rbc	Senior	3	6.51	0.25	0.7783
Rbc	Young	14	6.4	0.81	0.7783
Rdw	Adult	12	12.8	1.58	0.7783
Rdw	Puppy	3	11.63	0.87	0.7783
Rdw	Senior	3	12.23	0.64	0.7783
Rdw	Young	14	12.72	1.11	0.7783
Rdw Cv	Adult	12	12.81	1.57	0.7783
Rdw Cv	Puppy	3	11.63	0.87	0.7783
Rdw Cv	Senior	3	12.25	0.65	0.7783
Rdw Cv	Young	14	12.79	1.13	0.7783
Ret He	Adult	12	24.57	0.96	0.7783
Ret He	Puppy	3	25.67	0.58	0.7783
Ret He	Senior	3	24.87	1.02	0.7783
Ret He	Young	14	24.37	0.99	0.7783
Reticolociti	Adult	12	43.99	18.41	0.8927
Reticolociti	Puppy	3	35.2	16.67	0.8927
Reticolociti	Senior	3	37.41	11.08	0.8927
Reticolociti	Young	14	42.34	21.69	0.8927
Reticolociti %	Adult	12	0.68	0.25	0.8927
Reticolociti %	Puppy	3	0.61	0.29	0.8927
Reticolociti %	Senior	3	0.57	0.16	0.8927
Reticolociti %	Young	14	0.65	0.29	0.8927
Sodium	Adult	12	144	2.63	0.8467
Sodium	Puppy	3	144.67	2.08	0.8467
Sodium	Senior	3	143	3.61	0.8467
Sodium	Young	14	144.64	2.44	0.8467
Total Prot	Adult	12	6.36	0.38	0.5796
Total Prot	Puppy	3	6.31	0.28	0.5796
Total Prot	Senior	3	6.64	0.41	0.5796
Total Prot	Young	14	6.1	0.26	0.5796
Urea	Adult	12	13.58	4.68	0.6346
Urea	Puppy	3	11	1	0.6346
Urea	Senior	3	19.67	4.73	0.6346
Urea	Young	14	14.79	4.14	0.6346
WBC	Adult	12	12.85	3.24	0.7783
WBC	Puppy	3	17.47	2.25	0.7783
WBC	Senior	3	11.5	3.64	0.7783
WBC	Young	14	13.7	3.6	0.7783
Wbc	Adult	12	12.98	3.27	0.7783
Wbc	Puppy	3	17.48	2.22	0.7783
Wbc	Senior	3	11.69	3.8	0.7783
Wbc	Young	14	13.24	4.08	0.7783
Α1 Globulin	Adult	12	0.24	0.05	0.7783
Α1 Globulin	Puppy	3	0.3	0.07	0.7783
Α1 Globulin	Senior	3	0.24	0.04	0.7783
Α1 Globulin	Young	14	0.24	0.06	0.7783
Α2 Globulin	Adult	12	0.58	0.11	0.7783
Α2 Globulin	Puppy	3	0.64	0.03	0.7783
Α2 Globulin	Senior	3	0.69	0.13	0.7783
Α2 Globulin	Young	14	0.58	0.12	0.7783

## Sheet: Data dictionary
Original name	Standardized name	Units	Description
A/G ratio	A/G ratio		Albumin to globulin ratio.
GPT	ALT		Alanine aminotransferase.
GOT	AST		Aspartate aminotransferase.
Albumina	Albumin		Serum albumin concentration.
Basofi	Basofi		Laboratory parameter.
Basofilo %	Basofilo %		Laboratory parameter.
β1-globulin	Beta-1 globulin		Serum globulin fraction.
β2-globulin	Beta-2 globulin		Serum globulin fraction.
Bilirrubin	Bilirrubin		Laboratory parameter.
Ca	Calcium		Laboratory parameter.
Colesterol	Cholesterol		Laboratory parameter.
Creatinina	Creatinine		Laboratory parameter.
Divario Osmolare	Divario Osmolare		Laboratory parameter.
Eosinof	Eosinof		Laboratory parameter.
Eosinofilo %	Eosinofilo %		Laboratory parameter.
Fosfatasa	Fosfatasa		Laboratory parameter.
Gamma-GT	GGT		Gamma-glutamyl transferase.
γ-globulin	Gamma globulin		Serum globulin fraction.
Glicemia	Glucose		Serum glucose concentration.
Hematocrit	Hematocrit		Packed cell volume.
Hematocrit.1	Hematocrit 1		Laboratory parameter.
Hemoglob	Hemoglob		Laboratory parameter.
Hemoglobin	Hemoglobin		Hemoglobin concentration.
Hepatozoon	Hepatozoon		Laboratory parameter.
HFR	Hfr		Laboratory parameter.
IRF	Irf		Laboratory parameter.
L. infantum	L Infantum		Laboratory parameter.
LFR	Lfr		Laboratory parameter.
Linfocit	Linfocit		Laboratory parameter.
Linfocit %	Linfocit %		Laboratory parameter.
MCH	MCH		Laboratory parameter.
MCHC	MCHC		Laboratory parameter.
MCV	MCV		Laboratory parameter.
MPV	MPV		Laboratory parameter.
MCH.1	Mch 1		Laboratory parameter.
MCHC.1	Mchc 1		Laboratory parameter.
MCV.1	Mcv 1		Laboratory parameter.
MFR	Mfr		Laboratory parameter.
Micoplasma	Micoplasma		Laboratory parameter.
Microfilaria	Microfilaria		Laboratory parameter.
Monocit	Monocit		Laboratory parameter.
Monocito %	Monocito %		Laboratory parameter.
MPV.1	Mpv 1		Laboratory parameter.
Neutroph	Neutroph		Laboratory parameter.
Neutroph %	Neutroph %		Laboratory parameter.
NRBC	Nrbc		Laboratory parameter.
NRBC %	Nrbc %		Laboratory parameter.
Osm Ser Calc	Osm Ser Calc		Laboratory parameter.
Osm Ser Med	Osm Ser Med		Laboratory parameter.
P-LCR	P Lcr		Laboratory parameter.
P-LCR.1	P Lcr 1		Laboratory parameter.
PCT	PCT		Laboratory parameter.
PDW	PDW		Laboratory parameter.
PCT.1	Pct 1		Laboratory parameter.
PDW.1	Pdw 1		Laboratory parameter.
Fosforo	Phosphorus		Laboratory parameter.
Platelets	Platelets		Laboratory parameter.
Potasio	Potasio		Laboratory parameter.
Glob Rojo	RBC		Red blood cell count.
RBC	Rbc		Red blood cell count.
RDW	Rdw		Laboratory parameter.
RDW-CV	Rdw Cv		Laboratory parameter.
RET-He	Ret He		Laboratory parameter.
Reticolociti	Reticolociti		Laboratory parameter.
Reticolociti %	Reticolociti %		Laboratory parameter.
Sodio	Sodium		Laboratory parameter.
Total Prot	Total Prot		Laboratory parameter.
Urea	Urea		Laboratory parameter.
Glob Blanco	WBC		White blood cell count.
WBC	Wbc		White blood cell count.
α1-globulin	Α1 Globulin		Serum globulin fraction.
α2-globulin	Α2 Globulin		Serum globulin fraction.
